# Supplementary material
Source: publisher site journal article supplement (https://www.dovepress.com/article/324707)

**Supplementary materials**

**Supplementary figure 1:** PCR Products of *aac (6')-Ib* gene. L; 100 bp DNA ladder supplied from Solis BioDyne, Estonia; lanes 60-75 and lanes 76-83 represent isolate number. The name of amplified gene and its molecular weight (482 bp) were stated above and below the amplified bands, respectively.


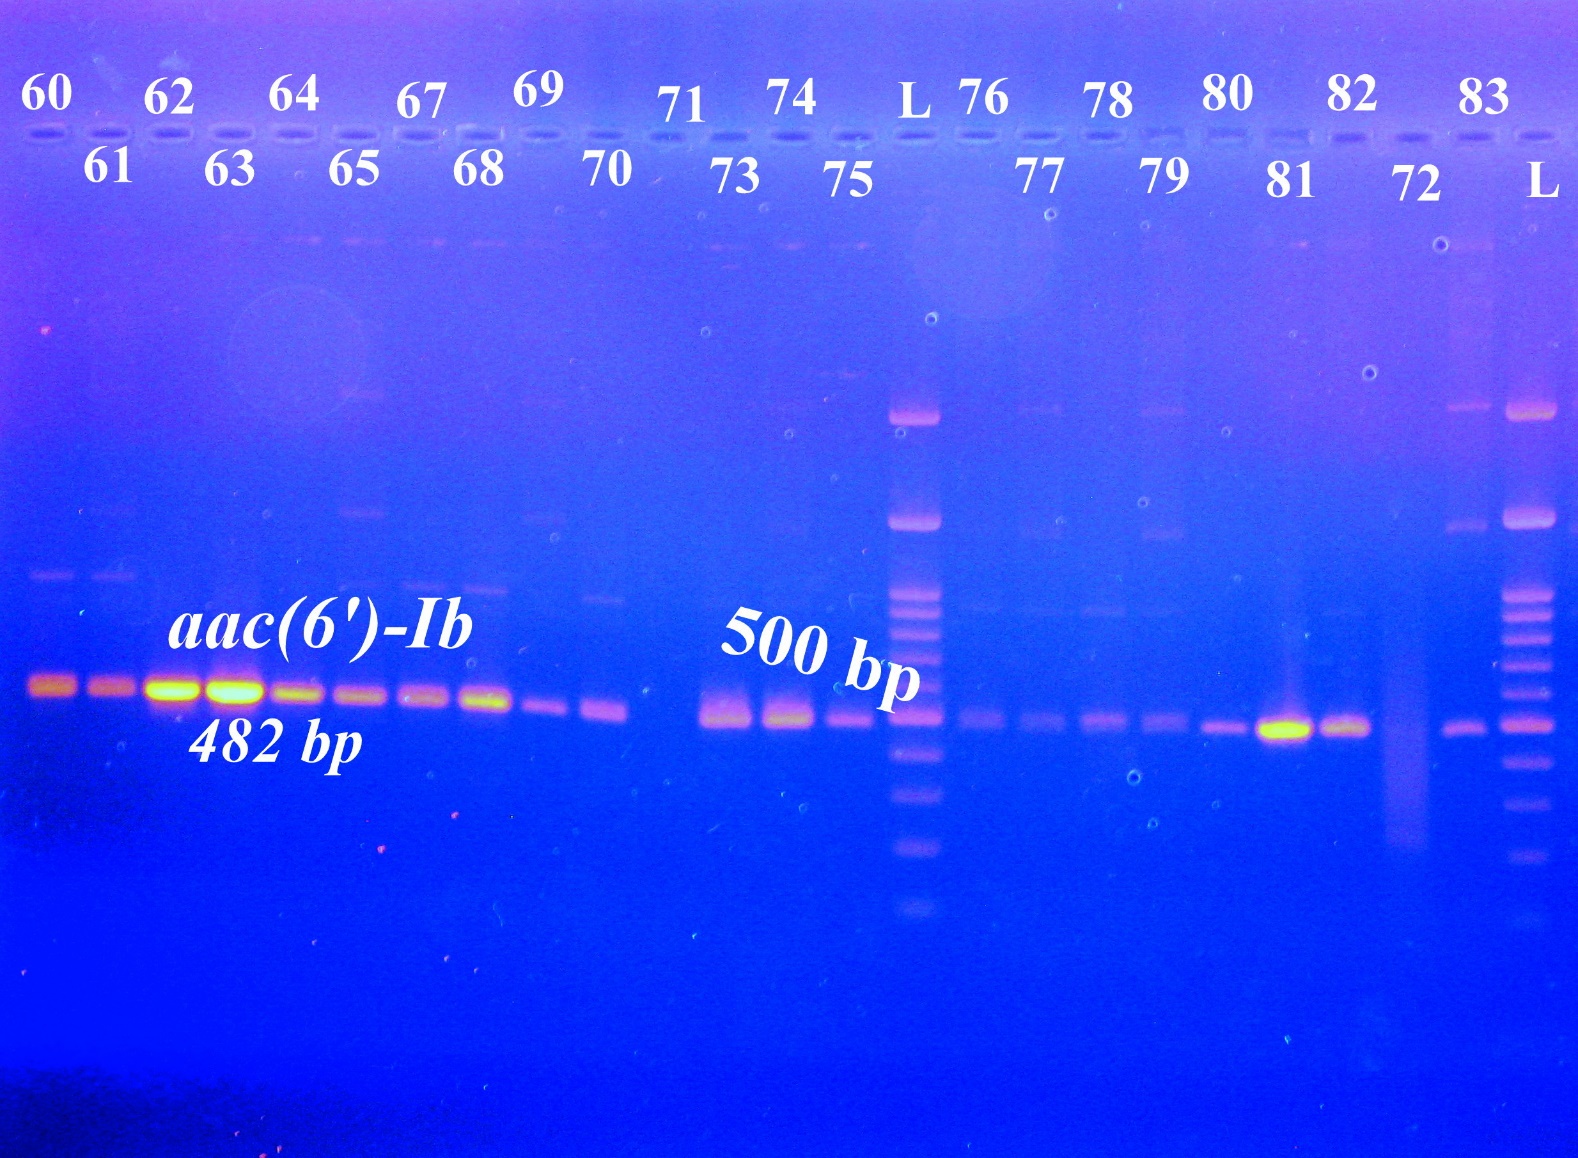


**Supplementary figure 2:** PCR Products of *aph (3')-IV* gene. L; 100 bp DNA ladder supplied from Solis BioDyne, Estonia; lanes 60-73 and lanes 74-94 represent isolate number. The name of amplified gene and its molecular weight (780 bp) were stated above and below the amplified bands, respectively.
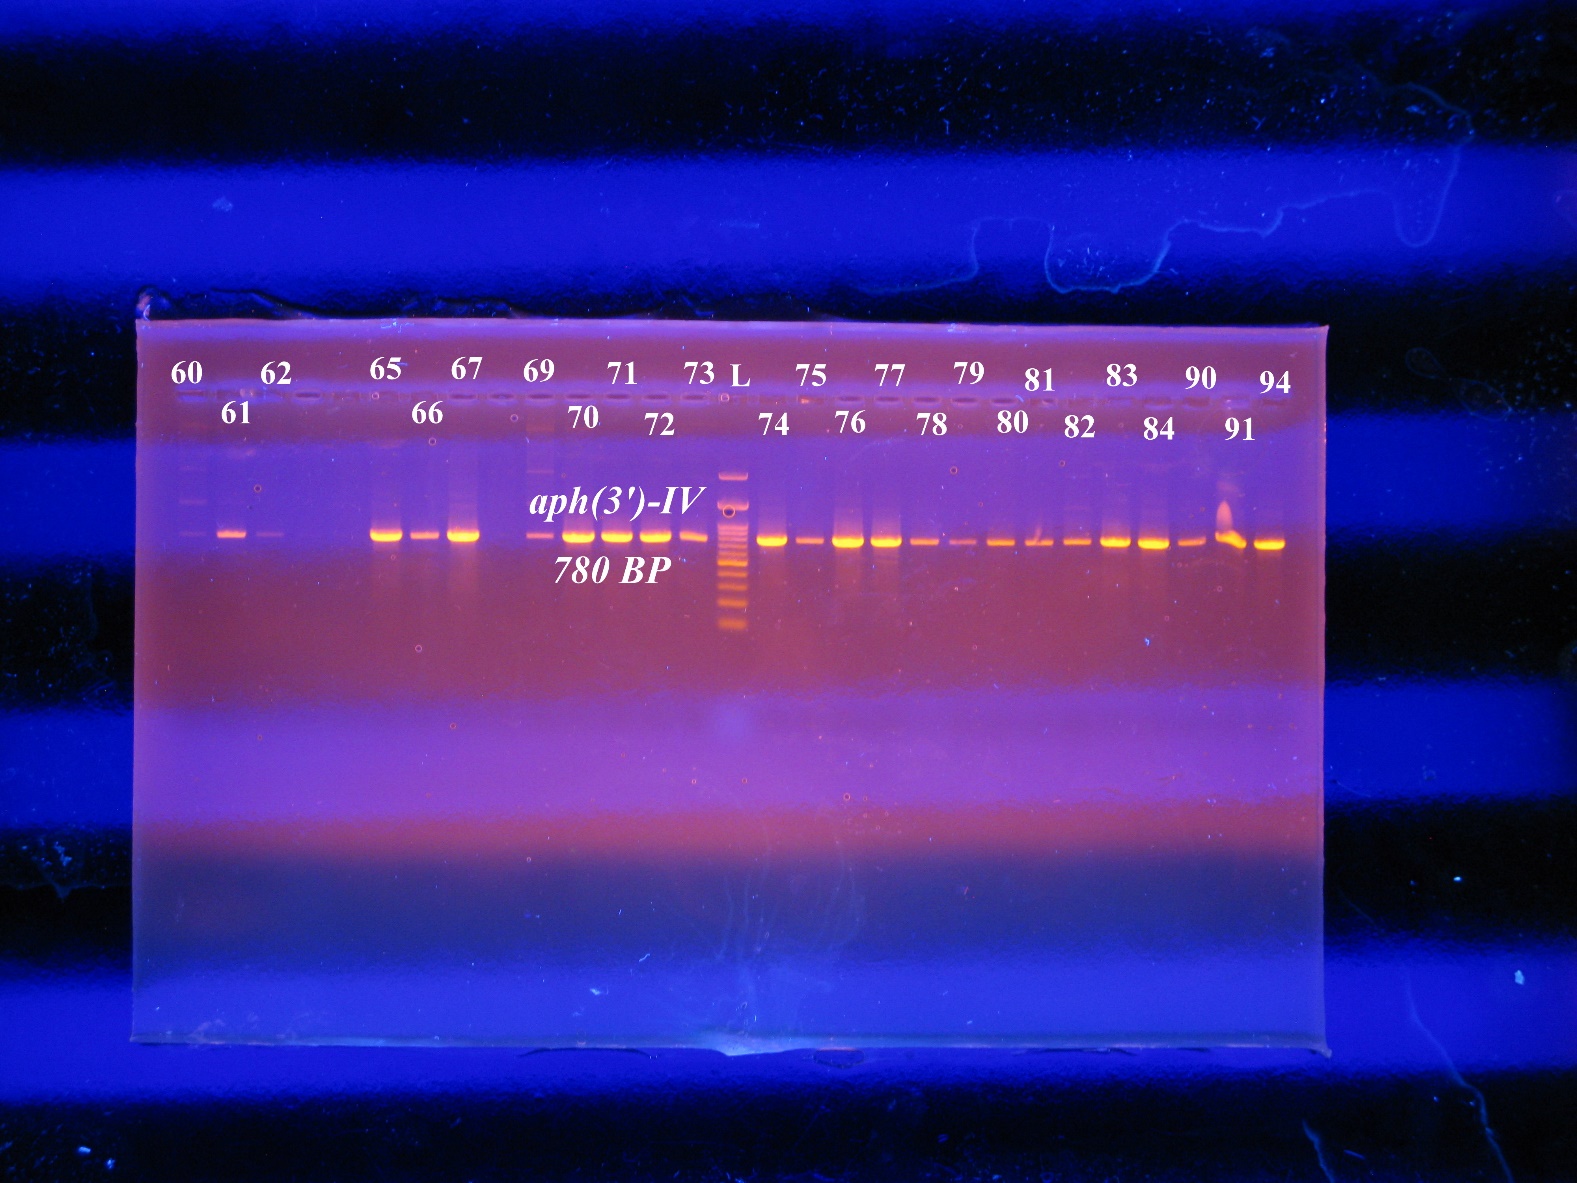


**Supplementary figure 3:** PCR Products of *aph (3')-IV* gene. L; 100 bp DNA ladder supplied from Solis BioDyne, Estonia; lanes 95-112 represent isolate number. The name of amplified gene and its molecular weight (780 bp) were stated above and below the amplified bands, respectively.


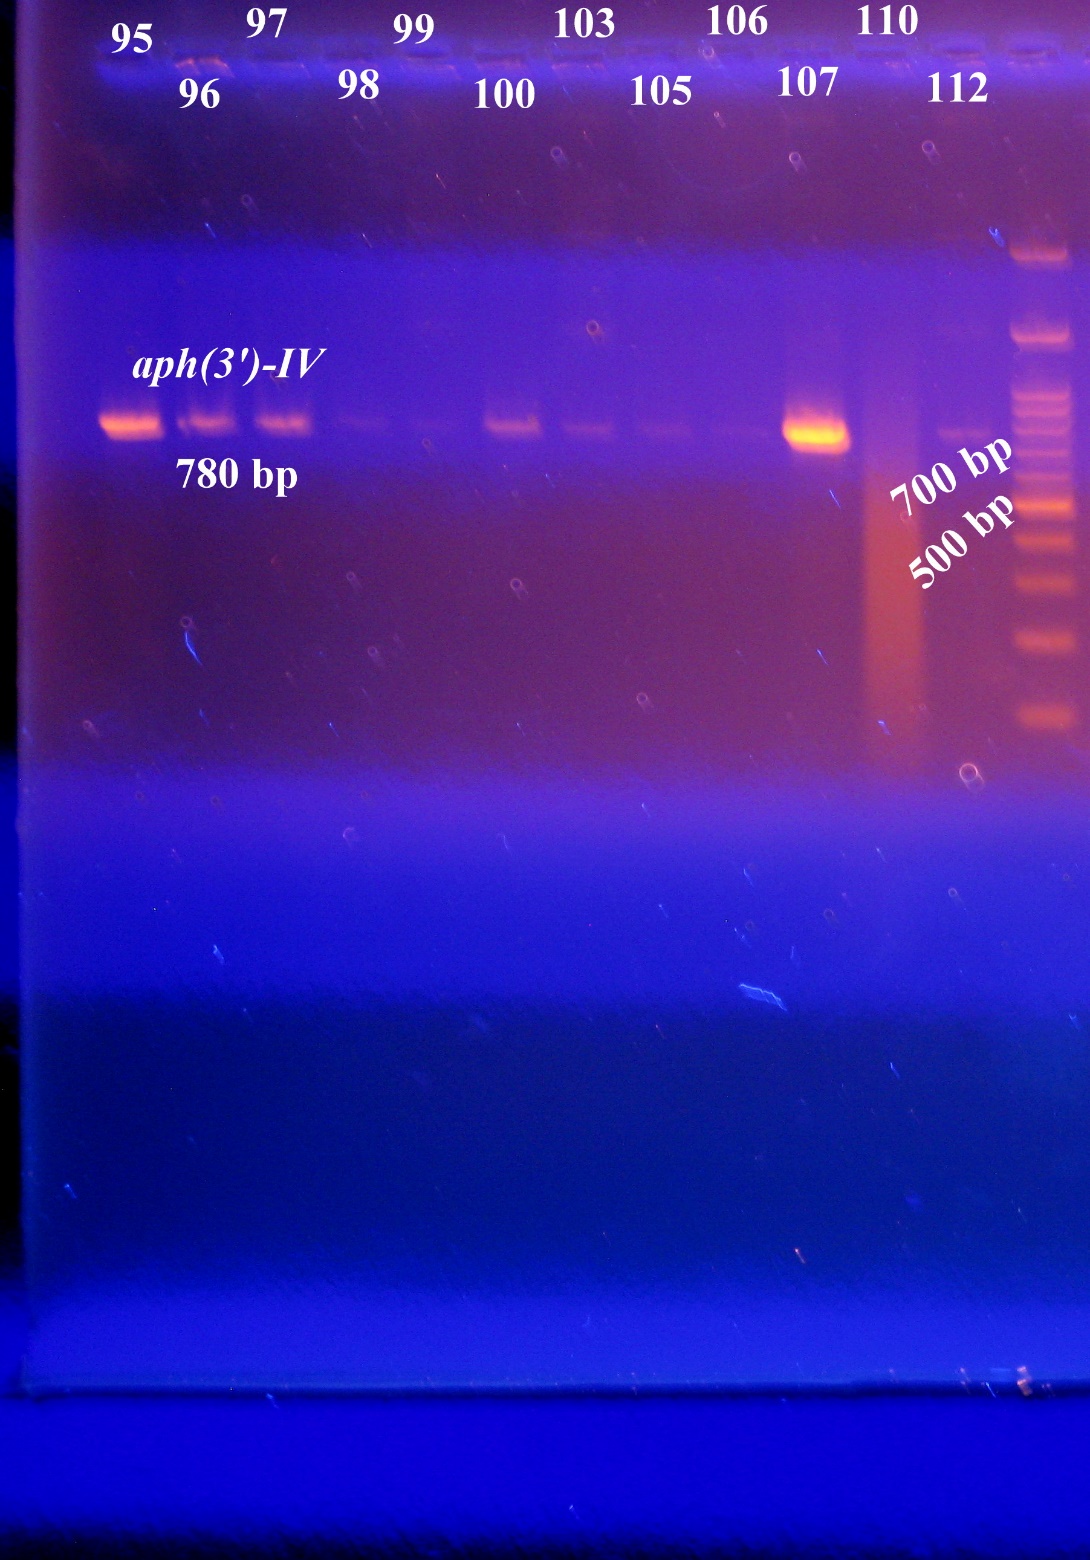


**Supplementary figure 4:** PCR Products of *ant (3'')-I* gene. L; 100 bp DNA ladder supplied from Solis BioDyne, Estonia; lanes 60-68 and lanes 69-76 represent isolate number. The name of amplified gene and its molecular weight (787 bp) were stated above and below the amplified bands, respectively.


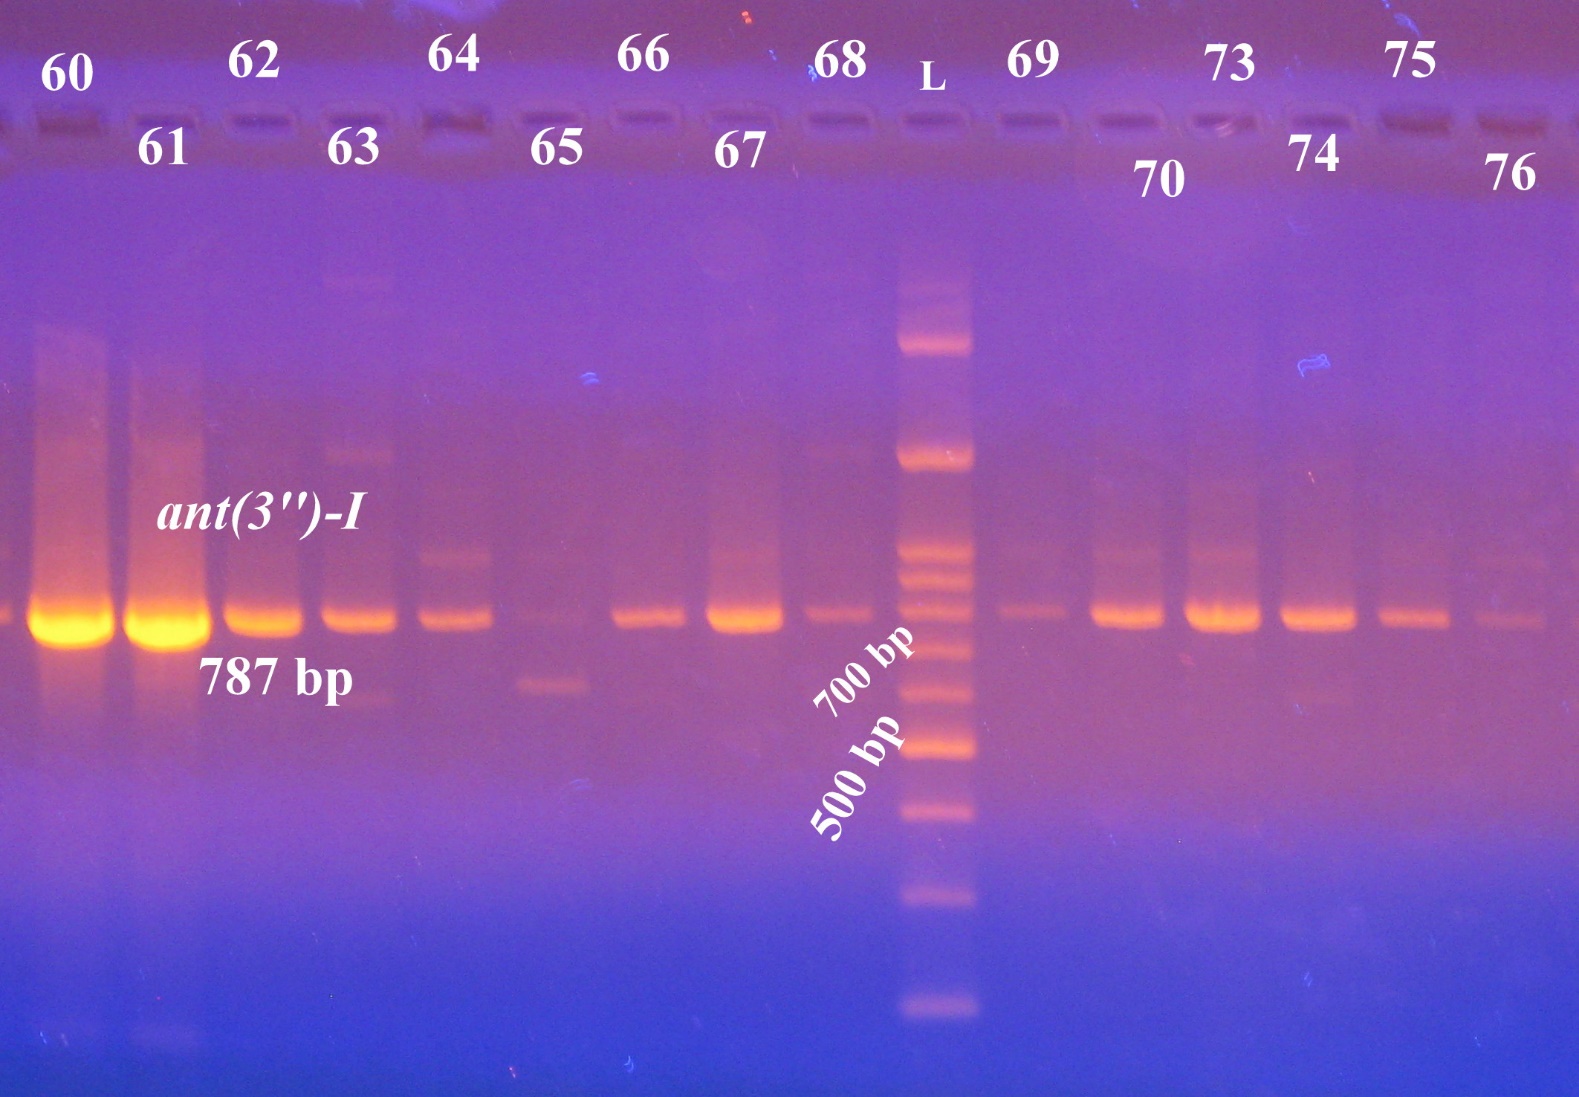


**Supplementary figure 5:** PCR Products of *armA* gene. L; 100 bp DNA ladder supplied from Solis BioDyne, Estonia; lanes 60-70 and lanes 75-94 represent isolate number. The name of amplified gene and its molecular weight (846 bp) were stated above and below the amplified bands, respectively.


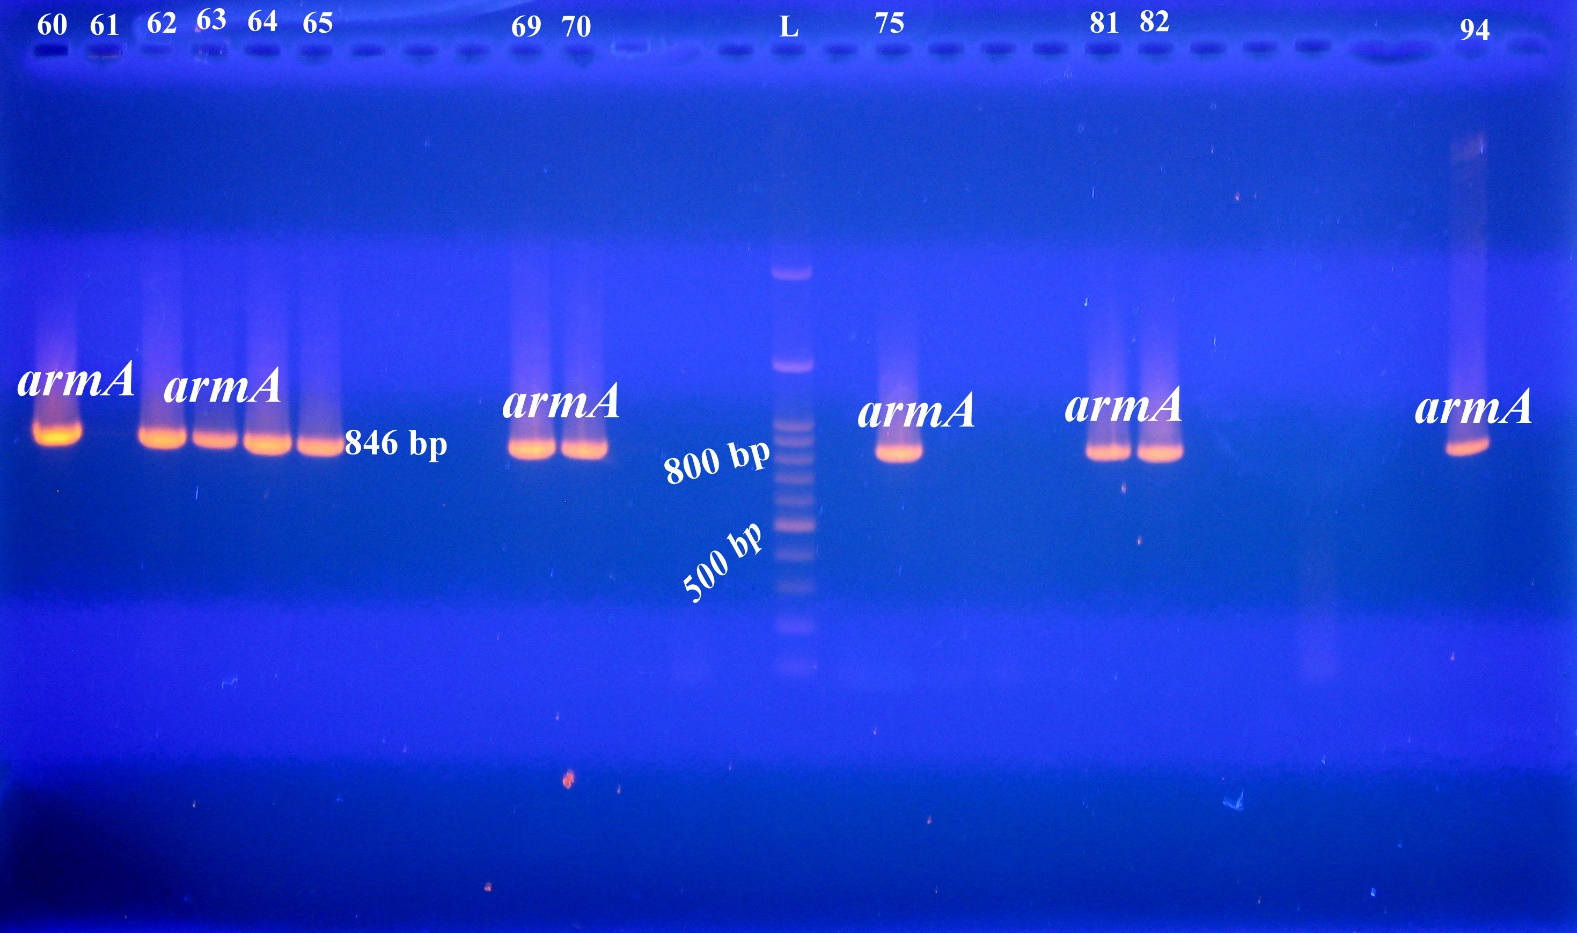


**Supplementary figure 6:** PCR Products of *armA* gene. L; 100 bp DNA ladder supplied from Solis BioDyne, Estonia; lanes 96-112 represent isolate number. The name of amplified gene and its molecular weight (846 bp) were stated above and below the amplified bands, respectively.


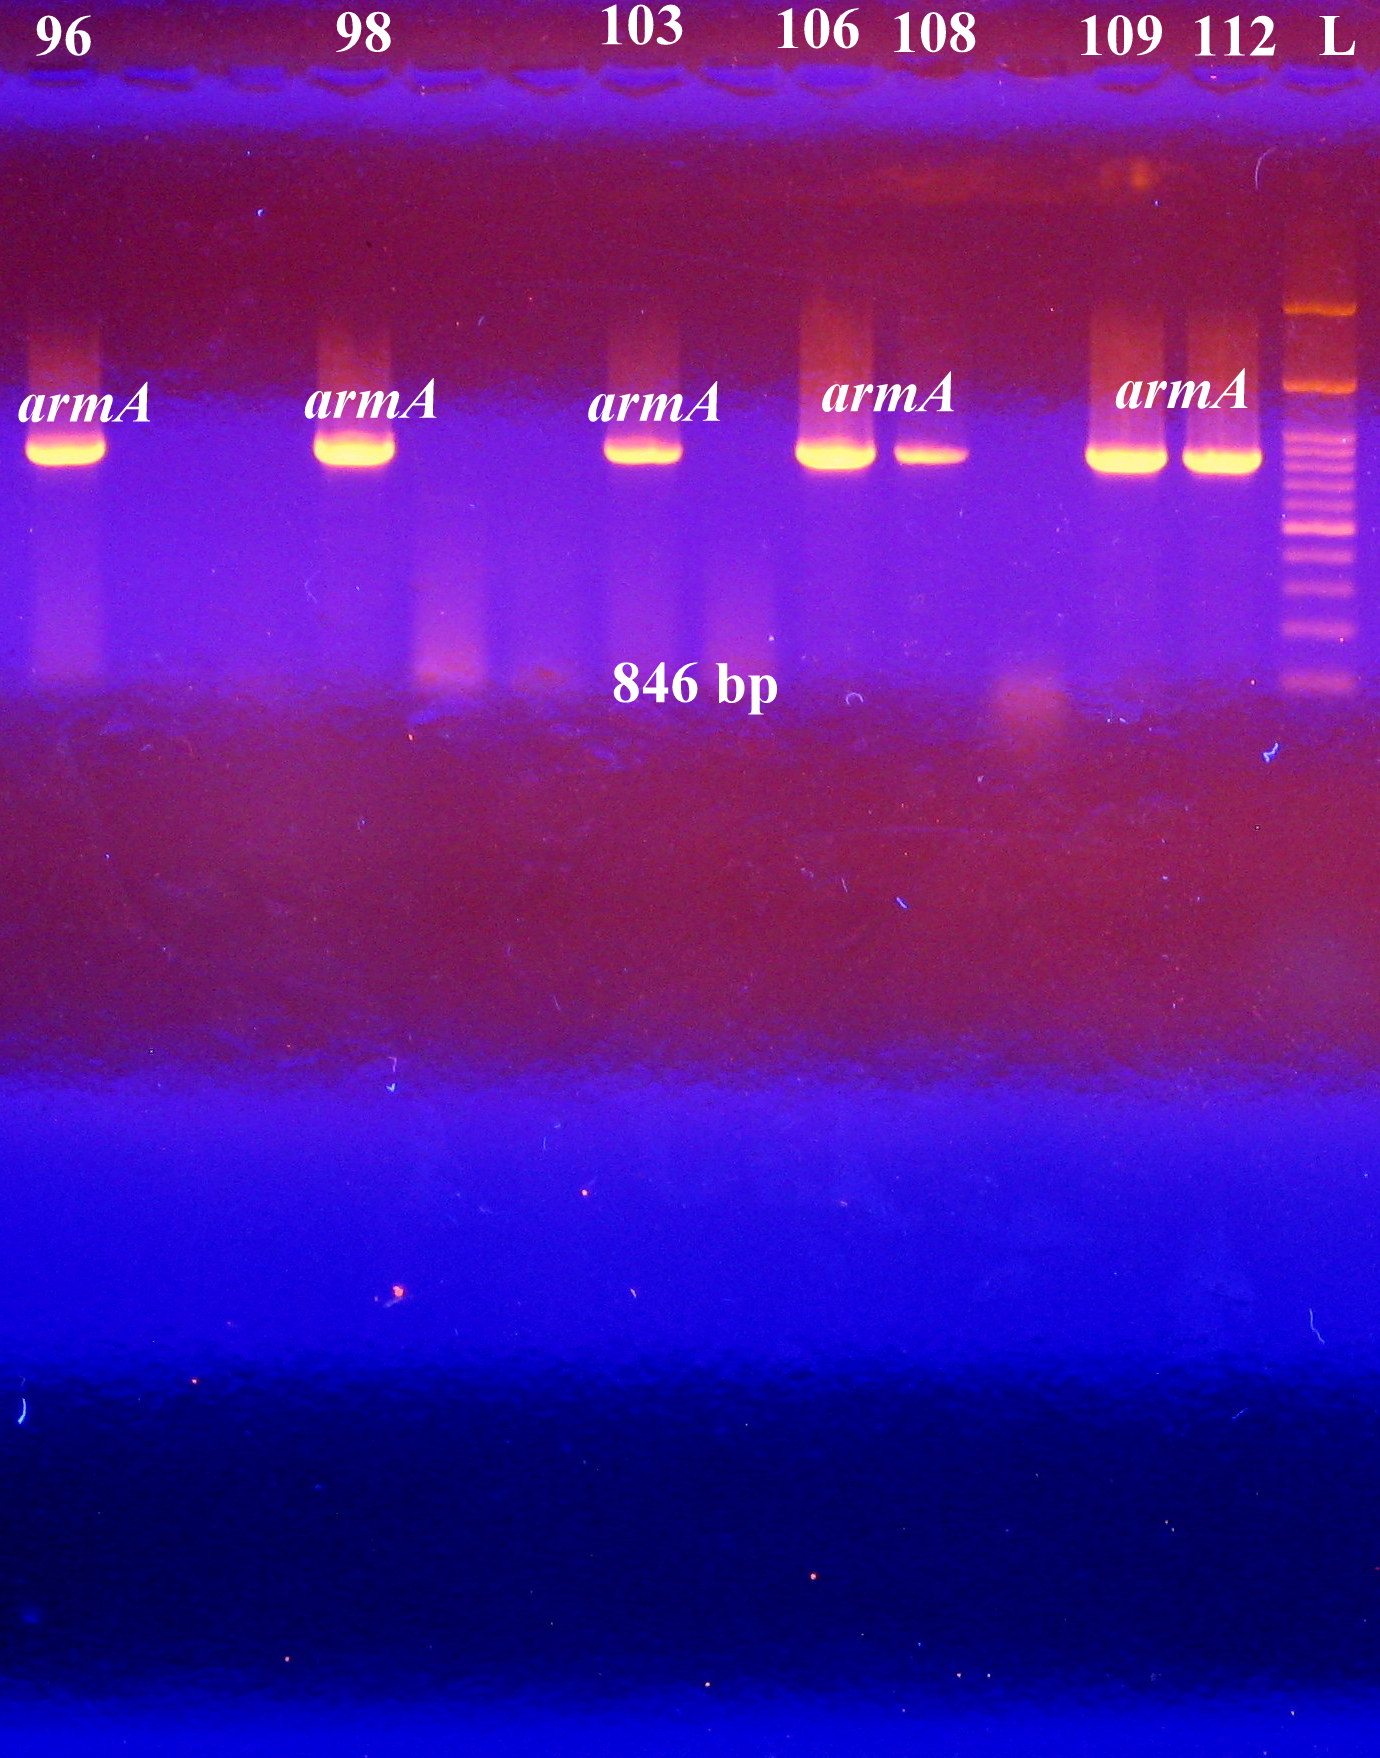


**Supplementary figure 7:** PCR Products of *sul1* gene. L; 100 bp DNA ladder supplied from Solis BioDyne, Estonia; lanes 61 and62 represent isolate number. The name of amplified gene and its molecular weight (822 bp) were stated above and below the amplified bands, respectively.


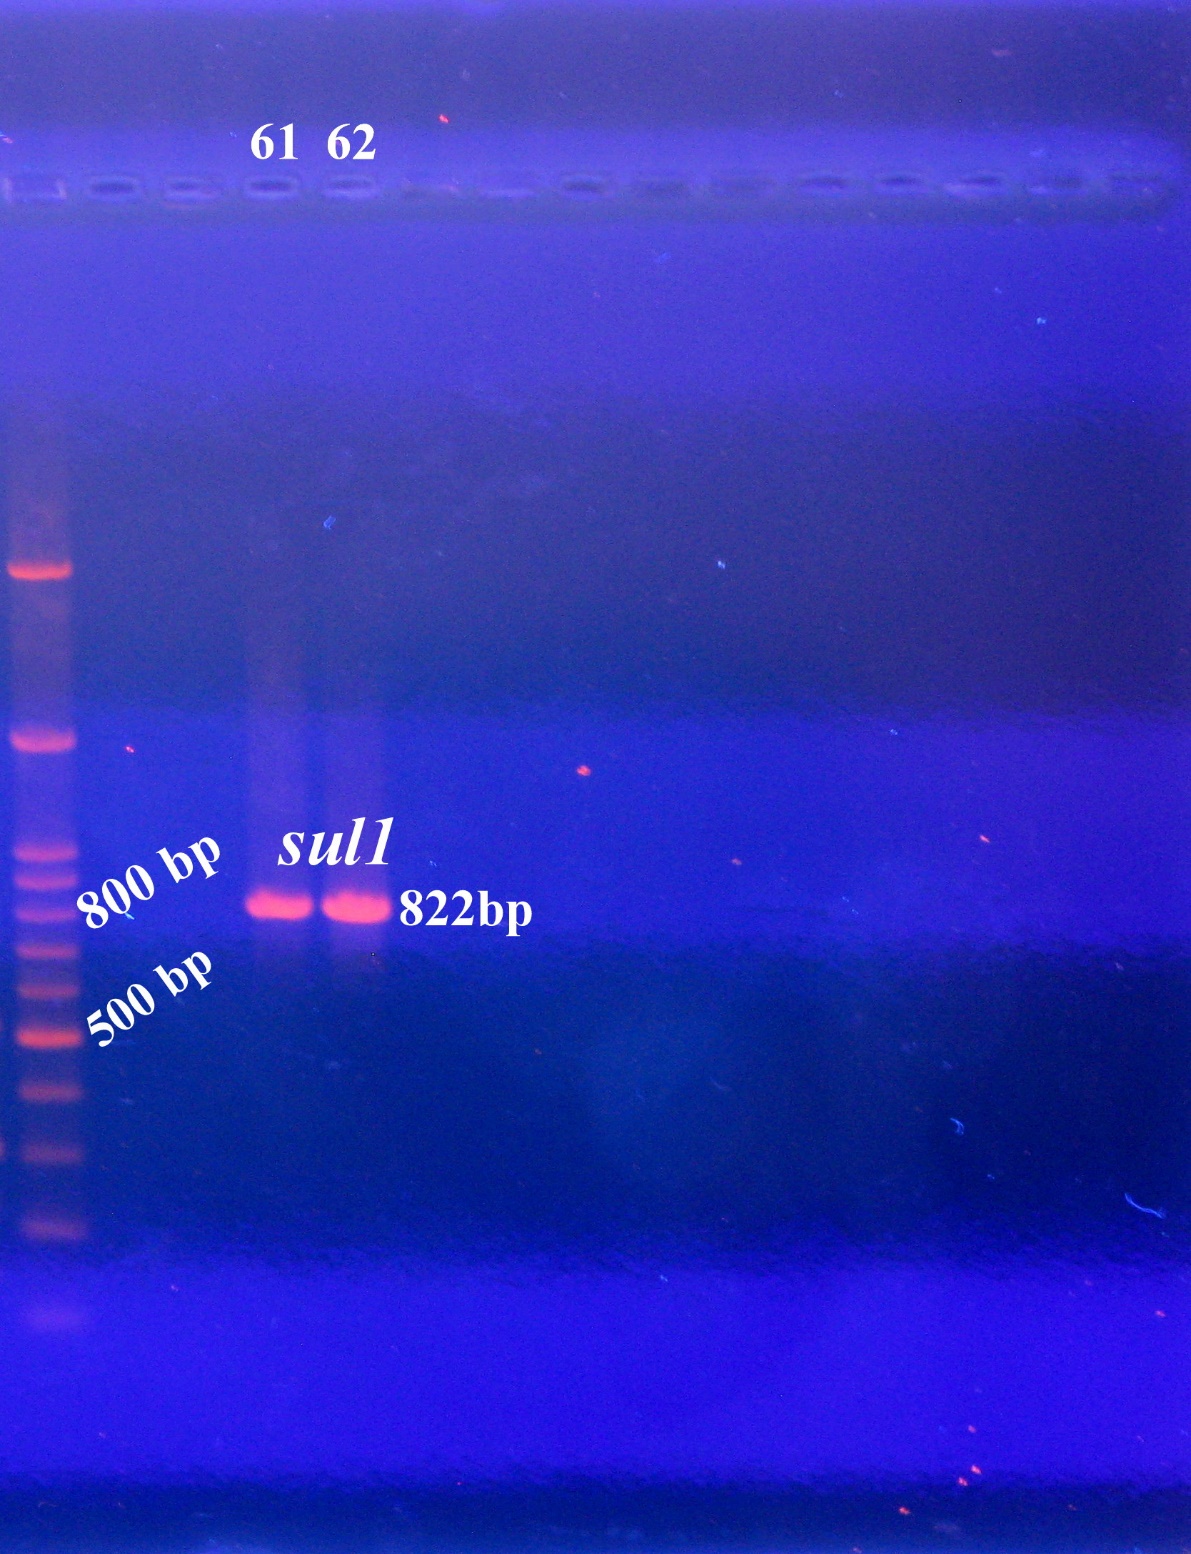


**Supplementary figure 8:** PCR Products of *sul1* gene. L; 100 bp DNA ladder supplied from Solis BioDyne, Estonia; lanes 81 and 96 represent isolate number. The name of amplified gene and its molecular weight (822 bp) were stated above and below the amplified bands, respectively.


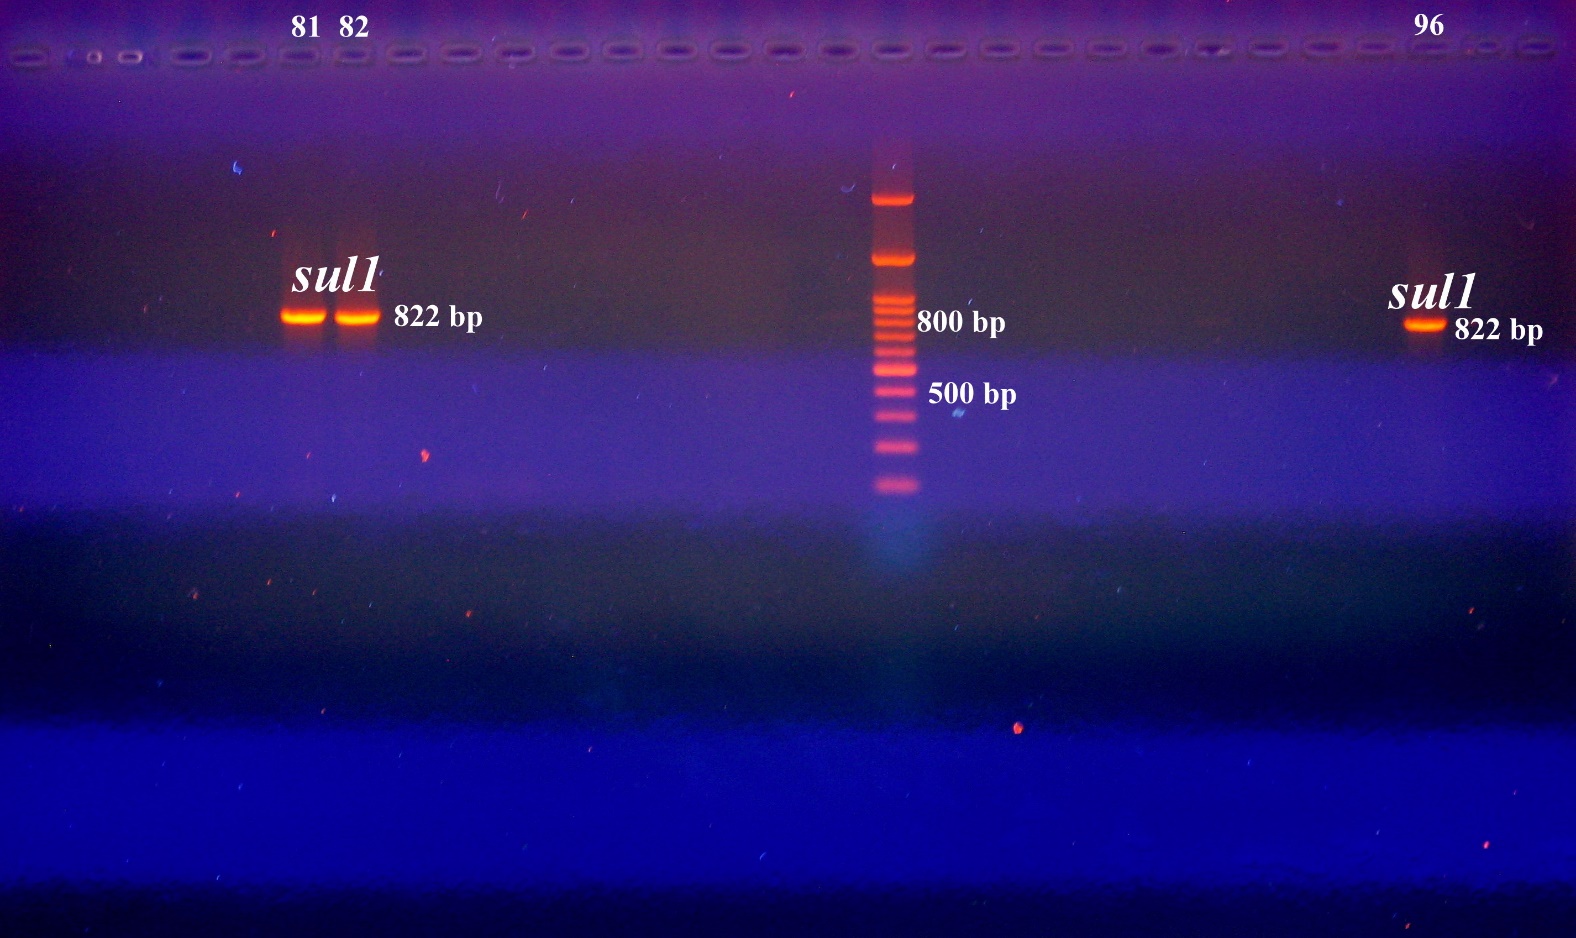


**Supplementary figure 9:** DNA fingerprint profile generated by RAPD-PCR for *A. baumannii* clinical isolates. L1 and L2, represent 100bp DNA ladder supplied from Solis BioDyne, Estonia. Lanes 60-69, lanes 70 -81, and lanes 82 -112 represent the isolate number.


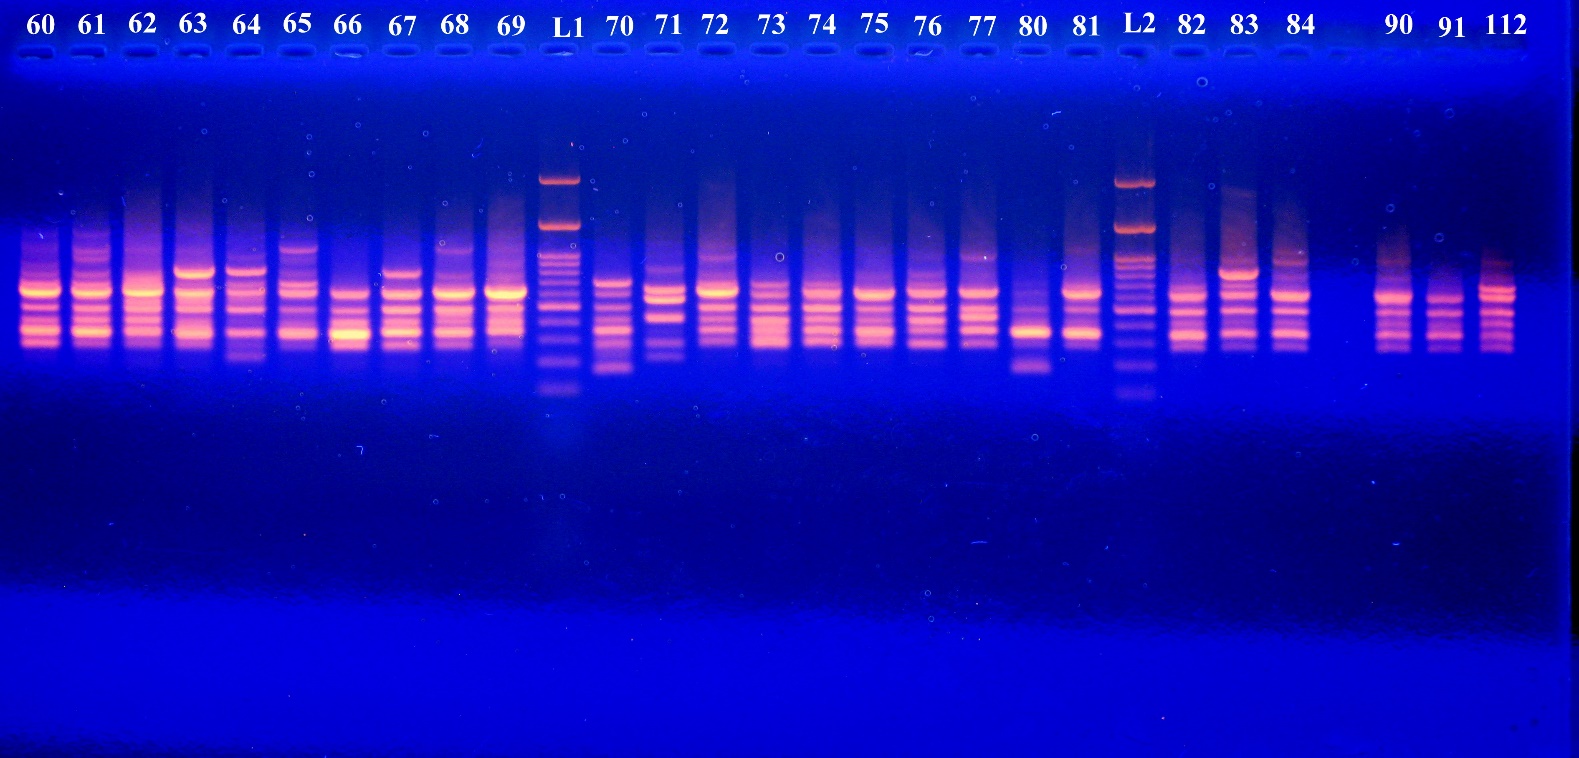

Supplement: Supplementary file 1 [file get_supplementary_file.php]
